# Supplementary material
Source: Research Square preprint supplement (doi:10.21203/rs.3.rs-9415903/v1)
Supplement: Supplementary file 1 [file d0823701d0b99570f446f185.xlsx]

## Sheet: Supplementary Table 1
TaGS3 Protein Sequence
ATname	GeneID	Transcript	Chr	Start	End	Strain
TaGS3-1	TraesCS7A03G0037700	TraesCS7A03G0037700.1	Chr4A	742000000	742000000	-
TaGS3-2	TraesCS5A03G0545300	TraesCS5A03G0545300.1	Chr5A	425000000	425000000	-
TaGS3-3	TraesCS4A03G1194500	TraesCS4A03G1194500.1	Chr7A	8079325	8081812	+
TaGS3-4	TraesCS5B03G0555000	TraesCS5B03G0555000.1	Chr5B	382000000	382000000	-
TaGS3-5	TraesCS7D03G0033100	TraesCS7D03G0033100.1	Chr5D	329000000	329000000	-
TaGS3-6	TraesCS5D03G0509000	TraesCS5D03G0509000.1	Chr7D	6831774	6834717	+

## Sheet: Supplementary Table 2
TaGS3 Protein Physicochemical Properties
Sequence ID	Number of Amino Acid	Molecular Weight	Theoretical pI	Instability Index	Aliphatic Index	Grand Average of Hydropathicity
TaGS3-1	170	17302.1	8.42	76.86	57.53	0.039
TaGS3-2	305	32555.3	8.34	75.62	43.48	-0.062
TaGS3-3	169	17300.1	8.22	64.05	58.99	0.092
TaGS3-4	285	30697	8.32	74.39	44.46	-0.079
TaGS3-5	299	31886.5	8.39	75.05	43.04	-0.088
TaGS3-6	169	17260	8.33	63.73	58.46	0.091
